# Supplementary material for: Assessing genomic diversity and signatures of selection in Jiaxian Red cattle using whole-genome sequencing data
Source: PubMed Central journal article supplement (PMC7796570; doi:10.1186/s12864-020-07340-0), 2021-01-09

GO term

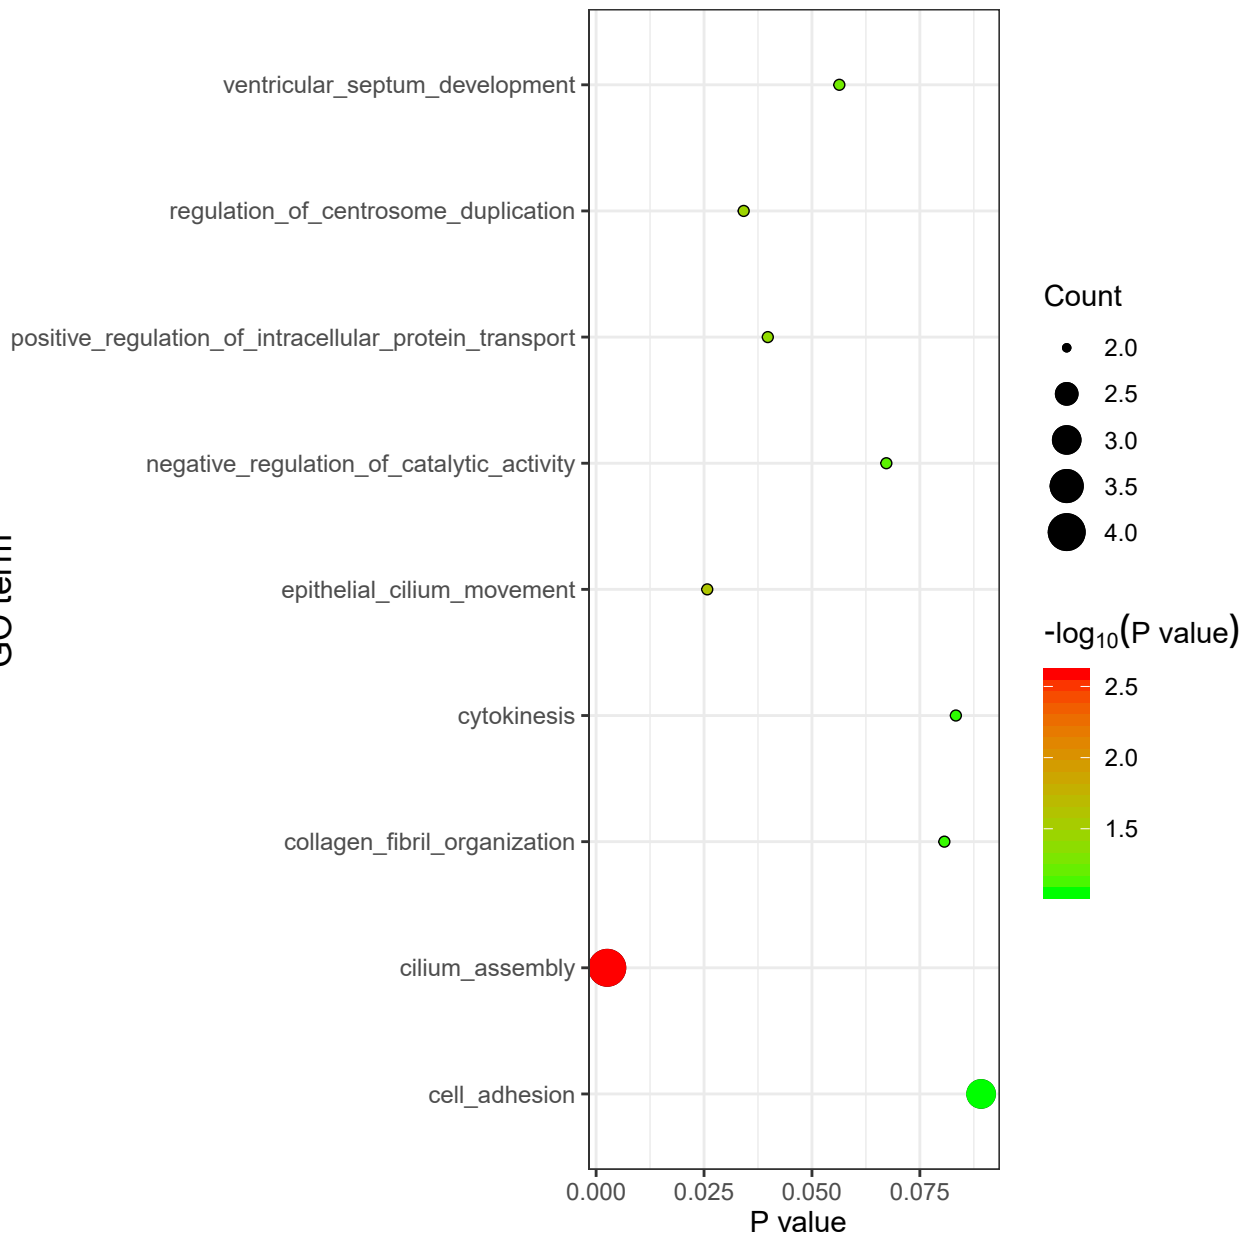

Supplement: 12864_2020_7340_MOESM3_ESM.pdf [file 12864_2020_7340_MOESM3_ESM.pdf]
